# Supplementary material for: Structure and C⋯N tetrel-bonding of the isopropylamine–CO2 complex studied by microwave spectroscopy and theoretical calculations
Source: Royal Society of Chemistry journal article supplement (doi:10.1039/d0cp00925c), 2020-01-01
Supplement: d0cp00925c1.pdf [file d0cp00925c1.pdf]

## Electronic Supplementary Information

# Structure and C··N tetrel-bonding of the isopropylamine-CO<sub>2</sub> complex studied by microwave spectroscopy and theoretical calculations

Tao Lu, Jiaqi Zhang, Qian Gou, and Gang Feng\*

School of Chemistry and Chemical Engineering, Chongqing University, Daxuecheng South Rd. 55, 401331, Chongqing, China.

### Contents:

**Fig. S1** The  $\omega$ B97XD/jun-cc-pVTZ calculated equilibrium structures of isomers **I**, **IV** and **V** of the CO<sub>2</sub>···IPA complex in the *ab*-, *ac*-, and *bc*-planes.

**Fig. S1** QTAIM analyses of the most stable isomers of the complexes of CO<sub>2</sub> with MA, EA and NPA. The BCPs are indicated with orange dots. The bond paths are shown in gold lines.

**Table S1.** Spectroscopic parameters of the six most stable isomers of CO<sub>2</sub>···IPA adduct calculated at  $\omega$ B97XD/jun-cc-pVTZ level of theory.

**Table S2.** Spectroscopic parameters of the six most stable isomers of CO<sub>2</sub>···IPA adduct calculated at MP2/6-311++G(2d,p) level of theory.

**Table S3.** Spectroscopic parameters of the six most stable isomers of CO<sub>2</sub>···IPA adduct calculated at B3LYP-D3(BJ)/jun-cc-pVTZ level of theory.

**Table S4.** Spectroscopic parameters of the six most stable isomers of CO<sub>2</sub>···IPA adduct calculated at B2PLYP-D3(BJ)/jun-cc-pVTZ level of theory.

**Table S5.** Experimental transition frequencies of the observed parent species of isomer **I** of CO<sub>2</sub>···IPA.

**Table S6.** Experimental transition frequencies of the observed parent species of isomer **II** of CO<sub>2</sub>···IPA.

**Table S7.** Experimental transition frequencies of the observed <sup>14</sup>N1 isotopic species of isomer **I** of CO<sub>2</sub>···IPA.

**Table S8.** Experimental transition frequencies of the observed <sup>13</sup>C2 isotopic species of isomer **I** of CO<sub>2</sub>···IPA.

**Table S9.** Experimental transition frequencies of the observed <sup>13</sup>C4 and <sup>13</sup>C5 isotopic species of isomer **I** of

CO<sub>2</sub>⋯IPA.

**Table S10.** Experimental transition frequencies of the observed <sup>13</sup>C14 isotopic species of isomer **I** of CO<sub>2</sub>⋯IPA.

**Table S11.** Intensities (in arbitrary units) of the two isomers for several  $\mu_a$ -type selected transitions.

**Table S12.** The percentage differences between the experimental and theoretical rotational constants of the isomers **I** and **II** of CO<sub>2</sub>⋯IPA adduct.

**Table S13.** Experimental ( $r_s$  and  $r_0$ ) and theoretical ( $r_e$ ) coordinates of the four C and one N atoms for the isomer **I** of CO<sub>2</sub>⋯IPA adduct.

**Table S14.** Partial  $r_0$  and calculated geometries at  $\omega$ B97XD/jun-cc-pVTZ level of isomer **I**.

**Table S15.** Partial  $r_0$  and calculated geometries at  $\omega$ B97XD/jun-cc-pVTZ level of isomer **II**.

**Table S16.** Stabilization energy contributions ( $\geq 0.21$  kJ/mol) for the isomer **I** of the CO<sub>2</sub>⋯IPA adduct.

**Table S17.** Stabilization energy contributions ( $\geq 0.21$  kJ/mol) for the isomer **II** of the CO<sub>2</sub>⋯IPA adduct.

**Table S18.** Results of the SAPT analysis for the isomers **I** and **II** of CO<sub>2</sub>⋯IPA, and compared with the complexes of CO<sub>2</sub> with eight nitrogen-containing compounds.

**Table S19.** NPA charges for the isomers **I** and **II** of CO<sub>2</sub>⋯IPA adduct and CO<sub>2</sub> and IPA isolated molecules. Bold values highlight the values of the sulfur and fluorine atoms involved in the charge transfer.

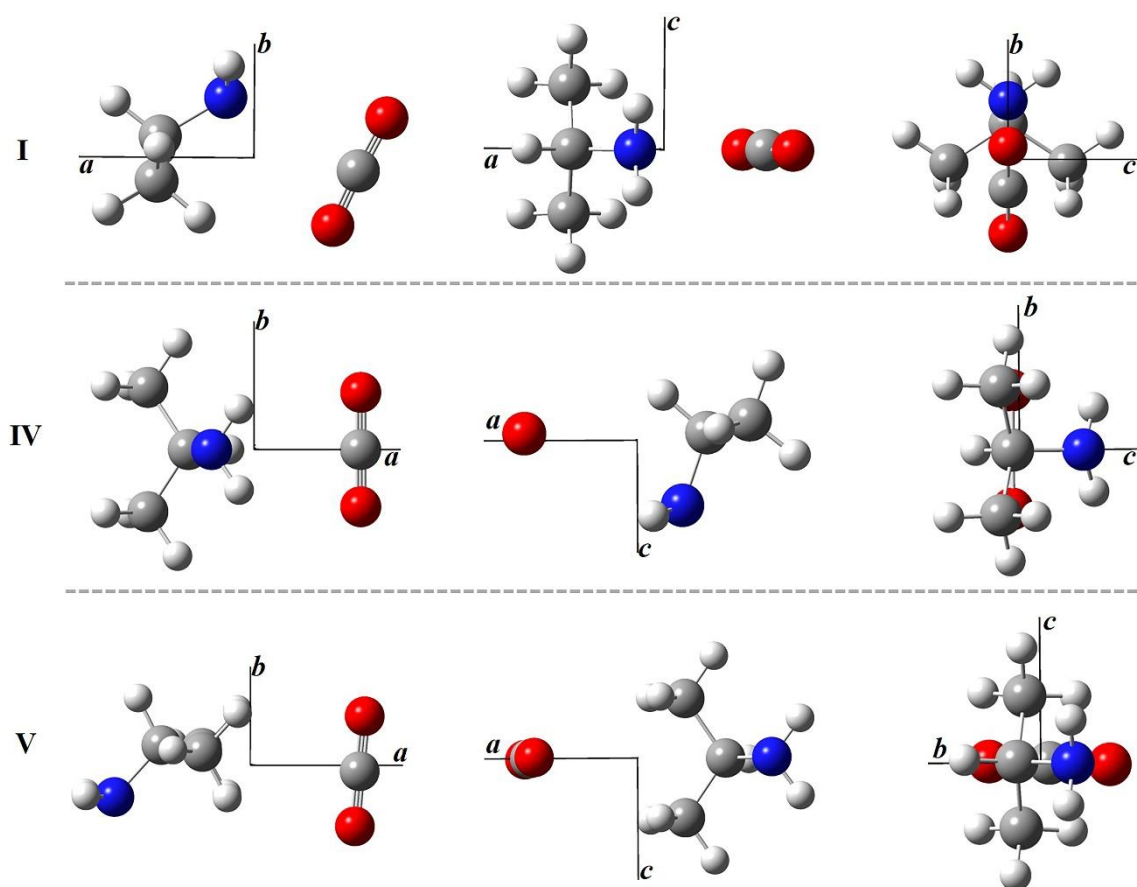

**Fig. S1.** The  $\omega$ B97XD/jun-cc-pVTZ calculated equilibrium structures of isomers **I**, **IV** and **V** of the CO<sub>2</sub>...IPA complex in the *ab*-, *ac*-, and *bc*-planes.

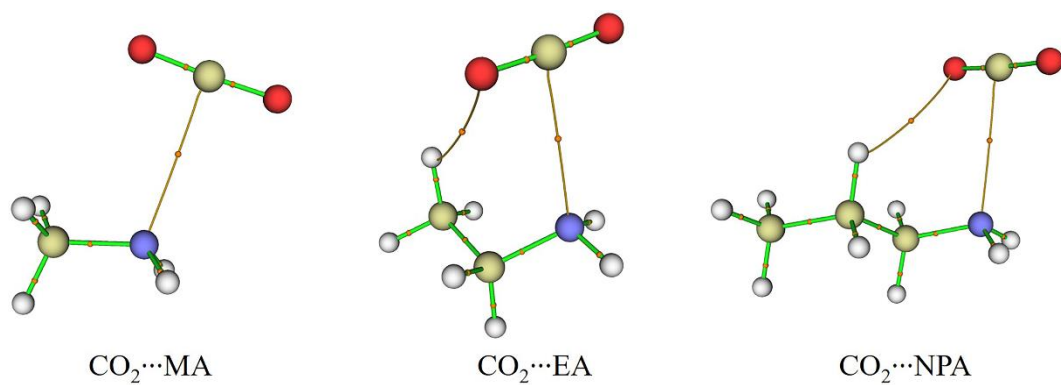

**Fig. S2.** QTAIM analyses of the most stable isomers of the complexes of CO<sub>2</sub> with MA, EA and NPA. The BCPs are indicated with orange dots. The bond paths are shown in gold lines.

**Table S1.** Spectroscopic parameters of the six most stable isomers of CO<sub>2</sub>⋯IPA adduct calculated at ωB97XD/jun-cc-pVTZ level of theory.

| Parameters <sup>a</sup>                  | I      | II     | III    | IV     | V      | VI    |
|------------------------------------------|--------|--------|--------|--------|--------|-------|
| $A$ (MHz)                                | 3881   | 4804   | 3879   | 3781   | 4368   | 4357  |
| $B$ (MHz)                                | 1249   | 1113   | 1169   | 1208   | 1016   | 1024  |
| $C$ (MHz)                                | 1191   | 1040   | 1043   | 1050   | 1006   | 1011  |
| $\chi_{aa}$ (MHz)                        | -1.464 | -3.525 | -1.766 | -2.285 | 0.790  | 0.216 |
| $(\chi_{bb}-\chi_{cc})$ (MHz)            | -2.599 | -0.656 | 3.497  | 1.879  | -4.919 | 5.243 |
| $ \mu_a $ (D)                            | 1.4    | 1.7    | 0.9    | 0.9    | 0.8    | 0.6   |
| $ \mu_b $ (D)                            | 1.0    | 0.6    | 0.2    | 0.0    | 1.0    | 0.0   |
| $ \mu_c $ (D)                            | 0.0    | 0.1    | 0.8    | 0.7    | 0.0    | 1.0   |
| $P_{cc}$ (uÅ <sup>2</sup> )              | 55.26  | 36.66  | 39.03  | 35.35  | 55.38  | 54.82 |
| $\Delta E_0$ (cm <sup>-1</sup> )         | 0      | 142    | 725    | 795    | 803    | 809   |
| $\Delta E_{0,BSSE}$ (cm <sup>-1</sup> )  | 0      | 141    | 717    | 789    | 793    | 799   |
| $\Delta G_{298.15K}$ (cm <sup>-1</sup> ) | 0      | 379    | 823    | 989    | 999    | 859   |
| $E_D$                                    | 13.0   | 12.3   | 4.5    | 3.6    | 3.6    | 4.5   |

<sup>a</sup>  $A$ ,  $B$ , and  $C$  are the rotational constants,  $\chi_{aa}$ ,  $\chi_{ac}$  and  $\chi_{bb}-\chi_{cc}$  are <sup>14</sup>N nuclear quadrupole coupling constants,  $|\mu_g$ ,  $g = a, b, c|$  are electric dipole moment components,  $P_{cc}$  is the planar moment of inertia ( $= \sum m_i c_i^2$ ),  $\sigma$  is standard deviation of the fit,  $N$  is number of transitions in the fit,  $\Delta E_0$  and  $\Delta E_{0,BSSE}$  are the relative energy with zero-point energy (ZPE) and BSSE corrections,  $\Delta G$  is the relative Gibbs free energy with respect to the most stable isomer calculated at 298.15 K,  $E_D$  is the dissociation energies with ZPE and BSSE corrections.

**Table S2.** Spectroscopic parameters of the six most stable isomers of CO<sub>2</sub>···IPA adduct calculated at MP2/6-311++G(2d,p) level of theory.

| Parameters <sup>a</sup>                  | I      | II     | III    | IV     | V      | VI    |
|------------------------------------------|--------|--------|--------|--------|--------|-------|
| $A$ (MHz)                                | 3851   | 4777   | 3873   | 3732   | 4323   | 4310  |
| $B$ (MHz)                                | 1257   | 1133   | 1176   | 1215   | 1021   | 1025  |
| $C$ (MHz)                                | 1195   | 1061   | 1050   | 1056   | 1008   | 1009  |
| $\chi_{aa}$ (MHz)                        | -1.554 | -3.595 | -1.713 | -2.393 | 0.733  | 0.187 |
| $(\chi_{bb}-\chi_{cc})$ (MHz)            | -2.260 | -0.307 | 3.396  | 1.556  | -4.601 | 5.059 |
| $ \mu_a $ (D)                            | 1.4    | 1.7    | 0.9    | 1.0    | 0.8    | 0.7   |
| $ \mu_b $ (D)                            | 0.9    | 0.5    | 0.3    | 0.0    | 1.2    | 0.0   |
| $ \mu_c $ (D)                            | 0.0    | 0.1    | 0.9    | 0.8    | 0.0    | 1.1   |
| $P_{cc}$ (uÅ <sup>2</sup> )              | 55.19  | 37.76  | 39.46  | 36.39  | 55.26  | 54.72 |
| $\Delta E_0$ (cm <sup>-1</sup> )         | 0      | 187    | 688    | 710    | 768    | 930   |
| $\Delta E_{0,BSSE}$ (cm <sup>-1</sup> )  | 0      | 188    | 588    | 605    | 616    | 779   |
| $\Delta G_{298.15K}$ (cm <sup>-1</sup> ) | 0      | 183    | 541    | 968    | 531    | 721   |
| $E_D$                                    | 10.1   | 10.0   | 3.0    | 2.8    | 2.7    | 2.9   |

<sup>a</sup>  $A$ ,  $B$ , and  $C$  are the rotational constants,  $\chi_{aa}$ ,  $\chi_{ac}$  and  $\chi_{bb}-\chi_{cc}$  are <sup>14</sup>N nuclear quadrupole coupling constants,  $|\mu_g$ ,  $g = a, b, c|$  are electric dipole moment components,  $P_{cc}$  is the planar moment of inertia ( $= \sum m_i c_i^2$ ),  $\sigma$  is standard deviation of the fit,  $N$  is number of transitions in the fit,  $\Delta E_0$  and  $\Delta E_{0,BSSE}$  are the relative energy with zero-point energy (ZPE) and BSSE corrections,  $\Delta G$  is the relative Gibbs free energy with respect to the most stable isomer calculated at 298.15 K,  $E_D$  is the dissociation energies with ZPE and BSSE corrections.

**Table S3.** Spectroscopic parameters of the six most stable isomers of CO<sub>2</sub>···IPA adduct calculated at B3LYP-D3(BJ)/jun-cc-pVTZ level of theory.

| Parameters <sup>a</sup>                  | I      | II     | III    | IV     | V      | VI    |
|------------------------------------------|--------|--------|--------|--------|--------|-------|
| $A$ (MHz)                                | 3878   | 4788   | 3868   | 3760   | 4344   | 4329  |
| $B$ (MHz)                                | 1265   | 1127   | 1170   | 1208   | 1018   | 1021  |
| $C$ (MHz)                                | 1207   | 1050   | 1045   | 1050   | 1008   | 1008  |
| $\chi_{aa}$ (MHz)                        | -1.479 | -3.563 | -1.744 | -2.323 | 0.807  | 0.215 |
| $(\chi_{bb}-\chi_{cc})$ (MHz)            | -2.654 | -0.689 | 3.535  | 1.913  | -5.003 | 5.281 |
| $ \mu_a $ (D)                            | 1.5    | 1.8    | 0.8    | 0.8    | 0.8    | 0.5   |
| $ \mu_b $ (D)                            | 1.0    | 0.6    | 0.2    | 0.0    | 1.1    | 0.0   |
| $ \mu_c $ (D)                            | 0.0    | 0.1    | 0.8    | 0.7    | 0.0    | 1.0   |
| $P_{cc}$ (uÅ <sup>2</sup> )              | 55.56  | 36.33  | 39.49  | 35.73  | 55.71  | 55.18 |
| $\Delta E_0$ (cm <sup>-1</sup> )         | 0      | 98     | 717    | 720    | 783    | 964   |
| $\Delta E_{0,BSSE}$ (cm <sup>-1</sup> )  | 0      | 99     | 709    | 714    | 772    | 853   |
| $\Delta G_{298.15K}$ (cm <sup>-1</sup> ) | 0      | 27     | 542    | 496    | 647    | 717   |
| $E_D$                                    | 14.1   | 14.1   | 5.6    | 5.5    | 4.8    | 5.1   |

<sup>a</sup>  $A$ ,  $B$ , and  $C$  are the rotational constants,  $\chi_{aa}$ ,  $\chi_{ac}$  and  $\chi_{bb}-\chi_{cc}$  are <sup>14</sup>N nuclear quadrupole coupling constants,  $|\mu_g$ ,  $g = a, b, c|$  are electric dipole moment components,  $P_{cc}$  is the planar moment of inertia ( $= \sum m_i c_i^2$ ),  $\sigma$  is standard deviation of the fit,  $N$  is number of transitions in the fit,  $\Delta E_0$  and  $\Delta E_{0,BSSE}$  are the relative energy with zero-point energy (ZPE) and BSSE corrections,  $\Delta G$  is the relative Gibbs free energy with respect to the most stable isomer calculated at 298.15 K,  $E_D$  is the dissociation energies with ZPE and BSSE corrections.

**Table S4.** Spectroscopic parameters of the six most stable isomers of CO<sub>2</sub>⋯IPA adduct calculated at B2PLYP-D3(BJ)/jun-cc-pVTZ level of theory.

| Parameters <sup>a</sup>                  | I      | II     | III    | IV     | V      | VI    |
|------------------------------------------|--------|--------|--------|--------|--------|-------|
| $A$ (MHz)                                | 3874   | 4788   | 3875   | 3757   | 4342   | 4323  |
| $B$ (MHz)                                | 1257   | 1123   | 1164   | 1204   | 1010   | 1015  |
| $C$ (MHz)                                | 1198   | 1041   | 1042   | 1046   | 998    | 1000  |
| $\chi_{aa}$ (MHz)                        | -1.440 | -3.503 | -1.731 | -2.272 | 0.797  | 0.195 |
| $(\chi_{bb}-\chi_{cc})$ (MHz)            | -2.546 | -0.600 | 3.380  | 1.790  | -4.818 | 5.098 |
| $ \mu_a $ (D)                            | 1.4    | 1.7    | 0.9    | 0.9    | 0.8    | 0.6   |
| $ \mu_b $ (D)                            | 0.9    | 0.5    | 0.2    | 0.0    | 1.1    | 0.0   |
| $ \mu_c $ (D)                            | 0.0    | 0.1    | 0.8    | 0.7    | 0.0    | 1.0   |
| $P_{cc}$ (uÅ <sup>2</sup> )              | 55.33  | 35.05  | 39.79  | 35.56  | 55.19  | 54.72 |
| $\Delta E_0$ (cm <sup>-1</sup> )         | 0      | 132    | 683    | 693    | 747    | 858   |
| $\Delta E_{0,BSSE}$ (cm <sup>-1</sup> )  | 0      | 134    | 669    | 679    | 717    | 829   |
| $\Delta G_{298.15K}$ (cm <sup>-1</sup> ) | 0      | 34     | 453    | 358    | 503    | 635   |
| $E_D$                                    | 12.6   | 12.6   | 4.6    | 4.5    | 4.1    | 4.3   |

<sup>a</sup>  $A$ ,  $B$ , and  $C$  are the rotational constants,  $\chi_{aa}$ ,  $\chi_{ac}$  and  $\chi_{bb}-\chi_{cc}$  are <sup>14</sup>N nuclear quadrupole coupling constants,  $|\mu_g$ ,  $g = a, b, c|$  are electric dipole moment components,  $P_{cc}$  is the planar moment of inertia ( $= \sum m_i c_i^2$ ),  $\sigma$  is standard deviation of the fit,  $N$  is number of transitions in the fit,  $\Delta E_0$  and  $\Delta E_{0,BSSE}$  are the relative energy with zero-point energy (ZPE) and BSSE corrections,  $\Delta G$  is the relative Gibbs free energy with respect to the most stable isomer calculated at 298.15 K,  $E_D$  is the dissociation energies with ZPE and BSSE corrections.



**Table S5.** Experimental transition frequencies of the observed parent species of isomer **I** of CO<sub>2</sub>⋯IPA.

| $J'$ | $K_a'$ | $K_c'$ | $F'$ | $J''$ | $K_a''$ | $K_c''$ | $F''$ | $\nu_{\text{obs}}$ (MHz) | $\Delta\nu_{\text{obs-calc}}$ (MHz) |
|------|--------|--------|------|-------|---------|---------|-------|--------------------------|-------------------------------------|
| 3    | 0      | 3      | 2    | 2     | 0       | 2       | 1     | 7244.0735                | 0.0008                              |
| 3    | 0      | 3      | 3    | 2     | 0       | 2       | 2     | 7244.1268                | 0.0003                              |
| 3    | 0      | 3      | 4    | 2     | 0       | 2       | 3     | 7244.1548                | 0.0008                              |
| 3    | 1      | 3      | 2    | 2     | 1       | 2       | 1     | 7166.9553                | -0.0032                             |
| 3    | 1      | 3      | 3    | 2     | 1       | 2       | 2     | 7166.8913                | -0.0012                             |
| 3    | 1      | 3      | 4    | 2     | 1       | 2       | 3     | 7167.0298                | 0.0010                              |
| 3    | 1      | 2      | 2    | 2     | 1       | 1       | 1     | 7326.5527                | 0.0041                              |
| 3    | 1      | 2      | 3    | 2     | 1       | 1       | 2     | 7326.3719                | 0.0003                              |
| 3    | 1      | 2      | 4    | 2     | 1       | 1       | 3     | 7326.4826                | 0.0011                              |
| 3    | 2      | 2      | 2    | 2     | 2       | 1       | 1     | 7247.1798                | 0.0015                              |
| 3    | 2      | 2      | 3    | 2     | 2       | 1       | 2     | 7246.5030                | 0.0012                              |
| 3    | 2      | 2      | 4    | 2     | 2       | 1       | 3     | 7246.9320                | -0.0047                             |
| 3    | 2      | 1      | 2    | 2     | 2       | 0       | 1     | 7250.4239                | 0.0004                              |
| 3    | 2      | 1      | 3    | 2     | 2       | 0       | 2     | 7249.7611                | 0.0003                              |
| 3    | 2      | 1      | 4    | 2     | 2       | 0       | 3     | 7250.1799                | -0.0045                             |
| 4    | 0      | 4      | 3    | 3     | 0       | 3       | 2     | 9654.8795                | -0.0029                             |
| 4    | 0      | 4      | 4    | 3     | 0       | 3       | 3     | 9654.8963                | 0.0025                              |
| 4    | 0      | 4      | 5    | 3     | 0       | 3       | 4     | 9654.9185                | -0.0010                             |
| 4    | 1      | 4      | 4    | 3     | 1       | 3       | 3     | 9554.8124                | 0.0023                              |
| 4    | 1      | 4      | 5    | 3     | 1       | 3       | 4     | 9554.8779                | 0.0020                              |
| 4    | 1      | 3      | 4    | 3     | 1       | 2       | 3     | 9767.4044                | 0.0010                              |
| 4    | 1      | 3      | 5    | 3     | 1       | 2       | 4     | 9767.4537                | 0.0012                              |
| 4    | 1      | 3      | 3    | 3     | 1       | 2       | 2     | 9767.4637                | -0.0041                             |
| 4    | 2      | 3      | 3    | 3     | 2       | 2       | 2     | 9661.6874                | 0.0010                              |
| 4    | 2      | 3      | 5    | 3     | 2       | 2       | 4     | 9661.6387                | 0.0002                              |
| 4    | 2      | 3      | 4    | 3     | 2       | 2       | 3     | 9661.4537                | 0.0015                              |
| 4    | 2      | 2      | 3    | 3     | 2       | 1       | 2     | 9669.8008                | 0.0022                              |
| 4    | 2      | 2      | 4    | 3     | 2       | 1       | 3     | 9669.5856                | 0.0034                              |
| 4    | 2      | 2      | 5    | 3     | 2       | 1       | 4     | 9669.7554                | 0.0024                              |
| 5    | 0      | 5      | 4    | 4     | 0       | 4       | 3     | 12062.3086               | -0.0056                             |
| 5    | 0      | 5      | 5    | 4     | 0       | 4       | 4     | 12062.3162               | 0.0075                              |
| 5    | 0      | 5      | 6    | 4     | 0       | 4       | 5     | 12062.3346               | -0.0006                             |
| 5    | 1      | 5      | 4    | 4     | 1       | 4       | 3     | 11941.7629               | 0.0031                              |
| 5    | 1      | 5      | 5    | 4     | 1       | 4       | 4     | 11941.7515               | -0.0018                             |
| 5    | 1      | 5      | 6    | 4     | 1       | 4       | 5     | 11941.7957               | 0.0026                              |
| 5    | 1      | 4      | 4    | 4     | 1       | 3       | 3     | 12207.4029               | -0.0041                             |
| 5    | 1      | 4      | 5    | 4     | 1       | 3       | 4     | 12207.3733               | -0.0004                             |
| 5    | 1      | 4      | 6    | 4     | 1       | 3       | 5     | 12207.4029               | 0.0006                              |
| 5    | 2      | 4      | 5    | 4     | 2       | 3       | 4     | 12075.5280               | 0.0009                              |
| 5    | 2      | 4      | 6    | 4     | 2       | 3       | 5     | 12075.6260               | -0.0005                             |
| 5    | 2      | 4      | 4    | 4     | 2       | 3       | 3     | 12075.6433               | 0.0066                              |

|   |   |   |   |   |   |   |   |            |         |
|---|---|---|---|---|---|---|---|------------|---------|
| 5 | 2 | 3 | 4 | 4 | 2 | 2 | 3 | 12091.8390 | 0.0056  |
| 5 | 2 | 3 | 5 | 4 | 2 | 2 | 4 | 12091.7475 | 0.0021  |
| 5 | 2 | 3 | 6 | 4 | 2 | 2 | 5 | 12091.8231 | -0.0022 |
| 5 | 3 | 3 | 4 | 4 | 3 | 2 | 3 | 12079.2884 | 0.0007  |
| 5 | 3 | 3 | 5 | 4 | 3 | 2 | 4 | 12079.0289 | -0.0030 |
| 5 | 3 | 3 | 6 | 4 | 3 | 2 | 5 | 12079.2350 | -0.0020 |
| 5 | 3 | 2 | 4 | 4 | 3 | 1 | 3 | 12079.4532 | -0.0022 |
| 5 | 3 | 2 | 5 | 4 | 3 | 1 | 4 | 12079.1960 | -0.0040 |
| 5 | 3 | 2 | 6 | 4 | 3 | 1 | 5 | 12079.4015 | -0.0033 |
| 6 | 0 | 6 | 5 | 5 | 0 | 5 | 4 | 14465.6174 | 0.0110  |
| 6 | 0 | 6 | 6 | 5 | 0 | 5 | 5 | 14465.5918 | 0.0005  |
| 6 | 0 | 6 | 7 | 5 | 0 | 5 | 6 | 14465.6174 | -0.0024 |
| 6 | 1 | 6 | 5 | 5 | 1 | 5 | 4 | 14327.5495 | 0.0054  |
| 6 | 1 | 6 | 6 | 5 | 1 | 5 | 5 | 14327.5442 | 0.0043  |
| 6 | 1 | 6 | 7 | 5 | 1 | 5 | 6 | 14327.5675 | -0.0004 |
| 6 | 1 | 5 | 5 | 5 | 1 | 4 | 4 | 14646.0392 | -0.0016 |
| 6 | 1 | 5 | 6 | 5 | 1 | 4 | 5 | 14646.0235 | 0.0046  |
| 6 | 1 | 5 | 7 | 5 | 1 | 4 | 6 | 14646.0392 | 0.0002  |
| 6 | 2 | 5 | 5 | 5 | 2 | 4 | 4 | 14488.6996 | 0.0007  |
| 6 | 2 | 5 | 6 | 5 | 2 | 4 | 5 | 14488.6372 | -0.0005 |
| 6 | 2 | 5 | 7 | 5 | 2 | 4 | 6 | 14488.6996 | 0.0010  |
| 6 | 2 | 4 | 5 | 5 | 2 | 3 | 4 | 14516.9456 | 0.0028  |
| 6 | 2 | 4 | 6 | 5 | 2 | 3 | 5 | 14516.9089 | 0.0020  |
| 6 | 2 | 4 | 7 | 5 | 2 | 3 | 6 | 14516.9456 | 0.0010  |
| 6 | 3 | 4 | 5 | 5 | 3 | 3 | 4 | 14495.5432 | -0.0053 |
| 6 | 3 | 4 | 6 | 5 | 3 | 3 | 5 | 14495.4092 | -0.0014 |
| 6 | 3 | 4 | 7 | 5 | 3 | 3 | 6 | 14495.5316 | 0.0019  |
| 6 | 3 | 3 | 5 | 5 | 3 | 2 | 4 | 14495.9917 | -0.0040 |
| 6 | 3 | 3 | 6 | 5 | 3 | 2 | 5 | 14495.8576 | -0.0010 |
| 6 | 3 | 3 | 7 | 5 | 3 | 2 | 6 | 14495.9776 | 0.0006  |
| 7 | 0 | 7 | 6 | 6 | 0 | 6 | 5 | 16864.0545 | -0.0052 |
| 7 | 0 | 7 | 7 | 6 | 0 | 6 | 6 | 16864.0366 | -0.0013 |
| 7 | 0 | 7 | 8 | 6 | 0 | 6 | 7 | 16864.0713 | 0.0026  |
| 7 | 1 | 7 | 6 | 6 | 1 | 6 | 5 | 16711.9920 | -0.0008 |
| 7 | 1 | 7 | 7 | 6 | 1 | 6 | 6 | 16711.9920 | 0.0034  |
| 7 | 1 | 7 | 8 | 6 | 1 | 6 | 7 | 16712.0049 | -0.0055 |
| 7 | 1 | 6 | 6 | 6 | 1 | 5 | 5 | 17083.0523 | -0.0015 |
| 7 | 1 | 6 | 8 | 6 | 1 | 5 | 7 | 17083.0523 | -0.0008 |
| 7 | 2 | 6 | 6 | 6 | 2 | 5 | 5 | 16900.6648 | 0.0023  |
| 7 | 2 | 6 | 7 | 6 | 2 | 5 | 6 | 16900.6237 | 0.0001  |
| 7 | 2 | 6 | 8 | 6 | 2 | 5 | 7 | 16900.6648 | -0.0002 |
| 7 | 2 | 5 | 6 | 6 | 2 | 4 | 5 | 16945.5901 | 0.0058  |
| 7 | 2 | 5 | 8 | 6 | 2 | 4 | 7 | 16945.5901 | 0.0013  |
| 7 | 3 | 5 | 6 | 6 | 3 | 4 | 5 | 16912.0299 | 0.0012  |

|   |   |   |   |   |   |   |   |            |         |
|---|---|---|---|---|---|---|---|------------|---------|
| 7 | 3 | 5 | 7 | 6 | 3 | 4 | 6 | 16911.9463 | -0.0006 |
| 7 | 3 | 5 | 8 | 6 | 3 | 4 | 7 | 16912.0166 | -0.0052 |
| 7 | 3 | 4 | 6 | 6 | 3 | 3 | 5 | 16913.0358 | 0.0016  |
| 7 | 3 | 4 | 7 | 6 | 3 | 3 | 6 | 16912.9534 | -0.0003 |
| 7 | 3 | 4 | 8 | 6 | 3 | 3 | 7 | 16913.0244 | -0.0030 |
| 8 | 0 | 8 | 7 | 7 | 0 | 7 | 6 | 19257.0898 | -0.0040 |
| 8 | 0 | 8 | 8 | 7 | 0 | 7 | 7 | 19257.0630 | -0.0040 |
| 8 | 0 | 8 | 9 | 7 | 0 | 7 | 8 | 19257.1024 | 0.0021  |
| 8 | 1 | 8 | 7 | 7 | 1 | 7 | 6 | 19094.9448 | 0.0044  |
| 8 | 1 | 8 | 8 | 7 | 1 | 7 | 7 | 19094.9378 | 0.0022  |
| 8 | 1 | 8 | 9 | 7 | 1 | 7 | 8 | 19094.9493 | -0.0047 |
| 8 | 1 | 7 | 7 | 7 | 1 | 6 | 6 | 19518.1102 | -0.0005 |
| 8 | 1 | 7 | 9 | 7 | 1 | 6 | 8 | 19518.1102 | -0.0001 |
| 8 | 2 | 7 | 7 | 7 | 2 | 6 | 6 | 19311.3427 | 0.0059  |
| 8 | 2 | 7 | 8 | 7 | 2 | 6 | 7 | 19311.3111 | 0.0016  |
| 8 | 2 | 7 | 9 | 7 | 2 | 6 | 8 | 19311.3427 | 0.0027  |
| 8 | 2 | 6 | 7 | 7 | 2 | 5 | 6 | 19378.1187 | 0.0084  |
| 8 | 2 | 6 | 8 | 7 | 2 | 5 | 7 | 19378.1187 | 0.0038  |
| 8 | 2 | 6 | 9 | 7 | 2 | 5 | 8 | 19378.1187 | 0.0033  |
| 8 | 3 | 6 | 7 | 7 | 3 | 5 | 6 | 19328.6835 | -0.0018 |
| 8 | 3 | 6 | 8 | 7 | 3 | 5 | 7 | 19328.6337 | 0.0002  |
| 8 | 3 | 6 | 9 | 7 | 3 | 5 | 8 | 19328.6835 | 0.0002  |
| 8 | 3 | 5 | 7 | 7 | 3 | 4 | 6 | 19330.6936 | -0.0005 |
| 8 | 3 | 5 | 8 | 7 | 3 | 4 | 7 | 19330.6488 | 0.0045  |
| 8 | 3 | 5 | 9 | 7 | 3 | 4 | 8 | 19330.6936 | 0.0013  |
| 2 | 2 | 1 | 1 | 1 | 1 | 0 | 0 | 12745.4507 | -0.0029 |
| 2 | 2 | 1 | 2 | 1 | 1 | 0 | 1 | 12744.7936 | 0.0032  |
| 2 | 2 | 1 | 3 | 1 | 1 | 0 | 2 | 12744.8937 | 0.0023  |
| 2 | 2 | 0 | 1 | 1 | 1 | 1 | 0 | 12798.3126 | -0.0034 |
| 2 | 2 | 0 | 2 | 1 | 1 | 1 | 1 | 12799.3281 | -0.0005 |
| 2 | 2 | 0 | 3 | 1 | 1 | 1 | 2 | 12798.7596 | 0.0031  |
| 3 | 1 | 3 | 2 | 2 | 0 | 2 | 1 | 9734.6831  | -0.0080 |
| 3 | 1 | 3 | 3 | 2 | 0 | 2 | 2 | 9734.4170  | -0.0026 |
| 3 | 1 | 3 | 4 | 2 | 0 | 2 | 3 | 9734.6831  | -0.0049 |
| 3 | 2 | 2 | 2 | 2 | 1 | 1 | 1 | 15107.1305 | 0.0030  |
| 3 | 2 | 2 | 3 | 2 | 1 | 1 | 2 | 15106.9090 | -0.0021 |
| 3 | 2 | 2 | 4 | 2 | 1 | 1 | 3 | 15107.0502 | -0.0001 |
| 3 | 2 | 1 | 2 | 2 | 1 | 2 | 1 | 15270.1172 | -0.0007 |
| 3 | 2 | 1 | 3 | 2 | 1 | 2 | 2 | 15271.0340 | -0.0018 |
| 3 | 2 | 1 | 4 | 2 | 1 | 2 | 3 | 15270.4455 | 0.0022  |
| 4 | 0 | 4 | 3 | 3 | 1 | 3 | 2 | 7164.2625  | -0.0015 |
| 4 | 0 | 4 | 4 | 3 | 1 | 3 | 3 | 7164.6003  | -0.0005 |
| 4 | 0 | 4 | 5 | 3 | 1 | 3 | 4 | 7164.3876  | 0.0022  |
| 4 | 1 | 4 | 3 | 3 | 0 | 3 | 2 | 12045.4488 | 0.0036  |

|   |   |   |   |   |   |   |   |            |         |
|---|---|---|---|---|---|---|---|------------|---------|
| 4 | 1 | 4 | 4 | 3 | 0 | 3 | 3 | 12045.1037 | 0.0006  |
| 4 | 1 | 4 | 5 | 3 | 0 | 3 | 4 | 12045.4060 | -0.0040 |
| 4 | 2 | 3 | 3 | 3 | 1 | 2 | 2 | 17442.2657 | 0.0003  |
| 4 | 2 | 3 | 4 | 3 | 1 | 2 | 3 | 17441.9923 | 0.0007  |
| 4 | 2 | 3 | 5 | 3 | 1 | 2 | 4 | 17442.2061 | -0.0011 |
| 4 | 2 | 2 | 3 | 3 | 1 | 3 | 2 | 17772.9596 | 0.0015  |
| 4 | 2 | 2 | 4 | 3 | 1 | 3 | 3 | 17773.7247 | -0.0008 |
| 4 | 2 | 2 | 5 | 3 | 1 | 3 | 4 | 17773.1682 | 0.0007  |
| 4 | 3 | 1 | 3 | 4 | 2 | 2 | 3 | 13223.0214 | 0.0006  |
| 4 | 3 | 1 | 5 | 4 | 2 | 2 | 5 | 13223.1034 | 0.0003  |
| 4 | 3 | 1 | 4 | 4 | 2 | 2 | 4 | 13223.4259 | 0.0029  |
| 5 | 0 | 5 | 4 | 4 | 1 | 4 | 3 | 9671.7458  | -0.0056 |
| 5 | 0 | 5 | 5 | 4 | 1 | 4 | 4 | 9672.0989  | -0.0004 |
| 5 | 0 | 5 | 6 | 4 | 1 | 4 | 5 | 9671.8480  | 0.0033  |
| 5 | 1 | 5 | 4 | 4 | 0 | 4 | 3 | 14332.3234 | 0.0008  |
| 5 | 1 | 5 | 5 | 4 | 0 | 4 | 4 | 14331.9602 | -0.0025 |
| 5 | 1 | 5 | 6 | 4 | 0 | 4 | 5 | 14332.2820 | -0.0016 |
| 5 | 2 | 4 | 4 | 4 | 1 | 3 | 3 | 19750.4321 | -0.0022 |
| 5 | 2 | 4 | 5 | 4 | 1 | 3 | 4 | 19750.1172 | 0.0018  |
| 5 | 2 | 4 | 6 | 4 | 1 | 3 | 5 | 19750.3815 | 0.0003  |
| 5 | 3 | 2 | 4 | 5 | 2 | 3 | 4 | 13210.6395 | -0.0034 |
| 5 | 3 | 2 | 5 | 5 | 2 | 3 | 5 | 13210.8765 | -0.0012 |
| 5 | 3 | 2 | 6 | 5 | 2 | 3 | 6 | 13210.6827 | 0.0001  |
| 6 | 0 | 6 | 5 | 5 | 1 | 5 | 4 | 12195.5920 | -0.0060 |
| 6 | 0 | 6 | 6 | 5 | 1 | 5 | 5 | 12195.9399 | 0.0026  |
| 6 | 0 | 6 | 7 | 5 | 1 | 5 | 6 | 12195.6746 | 0.0032  |
| 6 | 1 | 6 | 5 | 5 | 0 | 5 | 4 | 16597.5565 | 0.0040  |
| 6 | 1 | 6 | 6 | 5 | 0 | 5 | 5 | 16597.1920 | -0.0019 |
| 6 | 1 | 6 | 7 | 5 | 0 | 5 | 6 | 16597.5137 | -0.0026 |
| 7 | 0 | 7 | 6 | 6 | 1 | 6 | 5 | 14732.1111 | -0.0025 |
| 7 | 0 | 7 | 7 | 6 | 1 | 6 | 6 | 14732.4291 | -0.0062 |
| 7 | 0 | 7 | 8 | 6 | 1 | 6 | 7 | 14732.1759 | 0.0037  |
| 7 | 1 | 7 | 6 | 6 | 0 | 6 | 5 | 18843.9416 | 0.0027  |
| 7 | 1 | 7 | 7 | 6 | 0 | 6 | 6 | 18843.5872 | -0.0040 |
| 7 | 1 | 7 | 8 | 6 | 0 | 6 | 7 | 18843.9038 | -0.0031 |
| 8 | 0 | 8 | 7 | 7 | 1 | 7 | 6 | 17277.2121 | -0.0025 |
| 8 | 0 | 8 | 8 | 7 | 1 | 7 | 7 | 17277.5109 | -0.0028 |
| 8 | 0 | 8 | 9 | 7 | 1 | 7 | 8 | 17277.2584 | -0.0037 |

---

**Table S6.** Experimental transition frequencies of the observed parent species of conformer **II** of CO<sub>2</sub>⋯IPA.

| $J'$ | $K_a'$ | $K_c'$ | $F'$ | $J''$ | $K_a''$ | $K_c''$ | $F''$ | $\nu_{\text{obs}}$ (MHz) | $\Delta\nu_{\text{obs-calc}}$ (MHz) |
|------|--------|--------|------|-------|---------|---------|-------|--------------------------|-------------------------------------|
| 3    | 0      | 3      | 2    | 2     | 0       | 2       | 1     | 6358.8134                | -0.0018                             |
| 3    | 0      | 3      | 3    | 2     | 0       | 2       | 2     | 6358.9694                | -0.0014                             |
| 3    | 0      | 3      | 4    | 2     | 0       | 2       | 3     | 6359.0130                | 0.0010                              |
| 3    | 1      | 3      | 2    | 2     | 1       | 2       | 1     | 6224.6841                | 0.0010                              |
| 3    | 1      | 3      | 3    | 2     | 1       | 2       | 2     | 6224.4170                | -0.0005                             |
| 3    | 1      | 3      | 4    | 2     | 1       | 2       | 3     | 6224.7053                | -0.0011                             |
| 3    | 1      | 2      | 3    | 2     | 1       | 1       | 2     | 6504.9427                | -0.0022                             |
| 3    | 1      | 2      | 4    | 2     | 1       | 1       | 3     | 6505.2248                | -0.0023                             |
| 3    | 2      | 2      | 2    | 2     | 2       | 1       | 1     | 6366.6801                | 0.0021                              |
| 3    | 2      | 2      | 3    | 2     | 2       | 1       | 2     | 6365.0850                | 0.0021                              |
| 3    | 2      | 2      | 4    | 2     | 2       | 1       | 3     | 6366.1052                | -0.0029                             |
| 3    | 2      | 1      | 2    | 2     | 2       | 0       | 1     | 6373.6907                | 0.0013                              |
| 3    | 2      | 1      | 3    | 2     | 2       | 0       | 2     | 6372.1004                | 0.0021                              |
| 3    | 2      | 1      | 4    | 2     | 2       | 0       | 3     | 6373.1159                | -0.0044                             |
| 4    | 0      | 4      | 4    | 3     | 0       | 3       | 3     | 8470.2226                | -0.0012                             |
| 4    | 0      | 4      | 3    | 3     | 0       | 3       | 2     | 8470.1590                | -0.0016                             |
| 4    | 0      | 4      | 5    | 3     | 0       | 3       | 4     | 8470.2509                | -0.0016                             |
| 4    | 1      | 4      | 4    | 3     | 1       | 3       | 3     | 8297.1415                | 0.0010                              |
| 4    | 1      | 4      | 3    | 3     | 1       | 3       | 2     | 8297.2299                | 0.0089                              |
| 4    | 1      | 4      | 5    | 3     | 1       | 3       | 4     | 8297.2691                | -0.0015                             |
| 4    | 1      | 3      | 4    | 3     | 1       | 2       | 3     | 8671.2018                | -0.0015                             |
| 4    | 1      | 3      | 3    | 3     | 1       | 2       | 2     | 8671.2942                | -0.0019                             |
| 4    | 1      | 3      | 5    | 3     | 1       | 2       | 4     | 8671.3282                | -0.0009                             |
| 4    | 2      | 3      | 3    | 3     | 2       | 2       | 2     | 8486.5206                | -0.0019                             |
| 4    | 2      | 3      | 5    | 3     | 2       | 2       | 4     | 8486.4111                | 0.0005                              |
| 4    | 2      | 3      | 4    | 3     | 2       | 2       | 3     | 8485.9755                | 0.0004                              |
| 4    | 2      | 2      | 3    | 3     | 2       | 1       | 2     | 8504.0344                | -0.0002                             |
| 4    | 2      | 2      | 4    | 3     | 2       | 1       | 3     | 8503.4889                | -0.0033                             |
| 4    | 2      | 2      | 5    | 3     | 2       | 1       | 4     | 8503.9219                | -0.0014                             |
| 5    | 0      | 5      | 5    | 4     | 0       | 4       | 4     | 10574.3476               | -0.0003                             |
| 5    | 0      | 5      | 4    | 4     | 0       | 4       | 3     | 10574.3148               | -0.0014                             |
| 5    | 0      | 5      | 6    | 4     | 0       | 4       | 5     | 10574.3671               | -0.0032                             |
| 5    | 1      | 5      | 5    | 4     | 1       | 4       | 4     | 10367.8956               | 0.0000                              |
| 5    | 1      | 5      | 4    | 4     | 1       | 4       | 3     | 10367.9295               | 0.0017                              |
| 5    | 1      | 5      | 6    | 4     | 1       | 4       | 5     | 10367.9688               | 0.0010                              |
| 5    | 1      | 4      | 5    | 4     | 1       | 3       | 4     | 10835.3933               | -0.0006                             |
| 5    | 1      | 4      | 4    | 4     | 1       | 3       | 3     | 10835.4360               | 0.0029                              |
| 5    | 1      | 4      | 6    | 4     | 1       | 3       | 5     | 10835.4633               | 0.0000                              |
| 5    | 2      | 3      | 4    | 4     | 2       | 2       | 3     | 10640.4036               | -0.0038                             |
| 5    | 2      | 3      | 5    | 4     | 2       | 2       | 4     | 10640.1655               | 0.0034                              |
| 5    | 2      | 3      | 6    | 4     | 2       | 2       | 5     | 10640.3876               | 0.0027                              |

|   |   |   |   |   |   |   |   |            |         |
|---|---|---|---|---|---|---|---|------------|---------|
| 5 | 3 | 3 | 4 | 4 | 3 | 2 | 3 | 10614.9807 | 0.0008  |
| 5 | 3 | 3 | 5 | 4 | 3 | 2 | 4 | 10614.3703 | 0.0008  |
| 5 | 3 | 3 | 6 | 4 | 3 | 2 | 5 | 10614.8636 | 0.0039  |
| 5 | 3 | 2 | 4 | 4 | 3 | 1 | 3 | 10615.4053 | -0.0022 |
| 5 | 3 | 2 | 5 | 4 | 3 | 1 | 4 | 10614.7975 | 0.0002  |
| 5 | 3 | 2 | 6 | 4 | 3 | 1 | 5 | 10615.2890 | 0.0017  |
| 6 | 0 | 6 | 6 | 5 | 0 | 5 | 5 | 12669.7414 | 0.0026  |
| 6 | 0 | 6 | 7 | 5 | 0 | 5 | 6 | 12669.7552 | -0.0027 |
| 6 | 1 | 6 | 6 | 5 | 1 | 5 | 5 | 12436.3314 | -0.0059 |
| 6 | 1 | 6 | 5 | 5 | 1 | 5 | 4 | 12436.3558 | 0.0034  |
| 6 | 1 | 6 | 7 | 5 | 1 | 5 | 6 | 12436.3822 | -0.0007 |
| 6 | 1 | 5 | 6 | 5 | 1 | 4 | 5 | 12996.9947 | 0.0012  |
| 6 | 1 | 5 | 5 | 5 | 1 | 4 | 4 | 12997.0066 | -0.0067 |
| 6 | 1 | 5 | 7 | 5 | 1 | 4 | 6 | 12997.0371 | -0.0001 |
| 6 | 2 | 5 | 5 | 5 | 2 | 4 | 4 | 12722.8506 | -0.0011 |
| 6 | 2 | 5 | 6 | 5 | 2 | 4 | 5 | 12722.7144 | -0.0014 |
| 6 | 2 | 5 | 7 | 5 | 2 | 4 | 6 | 12722.8506 | -0.0013 |
| 6 | 2 | 4 | 5 | 5 | 2 | 3 | 4 | 12783.6810 | 0.0010  |
| 6 | 2 | 4 | 6 | 5 | 2 | 3 | 5 | 12783.5456 | -0.0059 |
| 6 | 2 | 4 | 7 | 5 | 2 | 3 | 6 | 12783.6810 | 0.0002  |
| 6 | 3 | 4 | 5 | 5 | 3 | 3 | 4 | 12739.4654 | -0.0013 |
| 6 | 3 | 4 | 6 | 5 | 3 | 3 | 5 | 12739.1358 | 0.0013  |
| 6 | 3 | 4 | 7 | 5 | 3 | 3 | 6 | 12739.4230 | 0.0010  |
| 6 | 3 | 3 | 5 | 5 | 3 | 2 | 4 | 12740.6060 | -0.0012 |
| 6 | 3 | 3 | 6 | 5 | 3 | 2 | 5 | 12740.2780 | 0.0027  |
| 6 | 3 | 3 | 7 | 5 | 3 | 2 | 6 | 12740.5644 | 0.0019  |
| 7 | 0 | 7 | 6 | 6 | 0 | 6 | 5 | 14755.0193 | -0.0042 |
| 7 | 0 | 7 | 7 | 6 | 0 | 6 | 6 | 14755.0371 | 0.0051  |
| 7 | 0 | 7 | 8 | 6 | 0 | 6 | 7 | 14755.0421 | -0.0070 |
| 7 | 1 | 7 | 6 | 6 | 1 | 6 | 5 | 14502.1295 | -0.0004 |
| 7 | 1 | 7 | 7 | 6 | 1 | 6 | 6 | 14502.1154 | -0.0066 |
| 7 | 1 | 7 | 8 | 6 | 1 | 6 | 7 | 14502.1492 | -0.0043 |
| 7 | 1 | 6 | 7 | 6 | 1 | 5 | 6 | 15155.3785 | -0.0011 |
| 7 | 1 | 6 | 8 | 6 | 1 | 5 | 7 | 15155.4077 | -0.0021 |
| 7 | 2 | 6 | 6 | 6 | 2 | 5 | 5 | 14838.2714 | 0.0091  |
| 7 | 2 | 6 | 7 | 6 | 2 | 5 | 6 | 14838.1818 | 0.0010  |
| 7 | 2 | 6 | 8 | 6 | 2 | 5 | 7 | 14838.2714 | 0.0022  |
| 7 | 2 | 5 | 6 | 6 | 2 | 4 | 5 | 14934.7610 | -0.0016 |
| 7 | 2 | 5 | 7 | 6 | 2 | 4 | 6 | 14934.6897 | 0.0003  |
| 7 | 2 | 5 | 8 | 6 | 2 | 4 | 7 | 14934.7735 | 0.0034  |
| 7 | 3 | 5 | 6 | 6 | 3 | 4 | 5 | 14864.7556 | -0.0025 |
| 7 | 3 | 5 | 7 | 6 | 3 | 4 | 6 | 14864.5584 | 0.0005  |
| 7 | 3 | 5 | 8 | 6 | 3 | 4 | 7 | 14864.7487 | 0.0074  |
| 7 | 3 | 4 | 6 | 6 | 3 | 3 | 5 | 14867.3152 | -0.0086 |

|   |   |   |   |   |   |   |   |            |         |
|---|---|---|---|---|---|---|---|------------|---------|
| 7 | 3 | 4 | 7 | 6 | 3 | 3 | 6 | 14867.1285 | 0.0043  |
| 7 | 3 | 4 | 8 | 6 | 3 | 3 | 7 | 14867.3152 | 0.0080  |
| 8 | 0 | 8 | 7 | 7 | 0 | 7 | 6 | 16829.2436 | 0.0053  |
| 8 | 0 | 8 | 8 | 7 | 0 | 7 | 7 | 16829.2436 | 0.0020  |
| 8 | 0 | 8 | 9 | 7 | 0 | 7 | 8 | 16829.2592 | 0.0017  |
| 8 | 1 | 8 | 7 | 7 | 1 | 7 | 6 | 16564.9599 | 0.0073  |
| 8 | 1 | 8 | 8 | 7 | 1 | 7 | 7 | 16564.9491 | 0.0012  |
| 8 | 1 | 8 | 9 | 7 | 1 | 7 | 8 | 16564.9683 | -0.0028 |
| 8 | 1 | 7 | 7 | 7 | 1 | 6 | 6 | 17309.8545 | -0.0048 |
| 8 | 1 | 7 | 8 | 7 | 1 | 6 | 7 | 17309.8545 | 0.0027  |
| 8 | 1 | 7 | 9 | 7 | 1 | 6 | 8 | 17309.8738 | -0.0005 |
| 8 | 2 | 7 | 7 | 7 | 2 | 6 | 6 | 16951.3473 | -0.0068 |
| 8 | 2 | 7 | 8 | 7 | 2 | 6 | 7 | 16951.3017 | 0.0004  |
| 8 | 2 | 7 | 9 | 7 | 2 | 6 | 8 | 16951.3658 | 0.0031  |
| 8 | 2 | 6 | 7 | 7 | 2 | 5 | 6 | 17094.2211 | -0.0040 |
| 8 | 2 | 6 | 8 | 7 | 2 | 5 | 7 | 17094.1868 | 0.0054  |
| 8 | 2 | 6 | 9 | 7 | 2 | 5 | 8 | 17094.2394 | 0.0052  |
| 8 | 3 | 6 | 7 | 7 | 3 | 5 | 6 | 16990.7886 | -0.0060 |
| 8 | 3 | 6 | 8 | 7 | 3 | 5 | 7 | 16990.6626 | -0.0026 |
| 8 | 3 | 6 | 9 | 7 | 3 | 5 | 8 | 16990.7886 | -0.0010 |
| 8 | 3 | 5 | 7 | 7 | 3 | 4 | 6 | 16995.9195 | -0.0029 |
| 8 | 3 | 5 | 8 | 7 | 3 | 4 | 7 | 16995.7912 | -0.0025 |
| 8 | 3 | 5 | 9 | 7 | 3 | 4 | 8 | 16995.9195 | 0.0021  |
| 2 | 2 | 1 | 1 | 1 | 1 | 0 | 0 | 15349.5083 | -0.0017 |
| 2 | 2 | 1 | 2 | 1 | 1 | 0 | 1 | 15349.7011 | 0.0067  |
| 2 | 2 | 1 | 3 | 1 | 1 | 0 | 2 | 15349.2377 | 0.0045  |
| 2 | 2 | 0 | 2 | 1 | 1 | 1 | 1 | 15445.0716 | -0.0024 |
| 2 | 2 | 0 | 3 | 1 | 1 | 1 | 2 | 15444.4423 | 0.0032  |
| 3 | 1 | 3 | 2 | 2 | 0 | 2 | 1 | 9803.2208  | -0.0038 |
| 3 | 1 | 3 | 3 | 2 | 0 | 2 | 2 | 9803.6129  | -0.0038 |
| 3 | 1 | 3 | 4 | 2 | 0 | 2 | 3 | 9803.4828  | 0.0001  |
| 3 | 2 | 2 | 2 | 2 | 1 | 1 | 1 | 17377.3694 | 0.0029  |
| 3 | 2 | 2 | 3 | 2 | 1 | 1 | 2 | 17378.0231 | 0.0019  |
| 3 | 2 | 2 | 4 | 2 | 1 | 1 | 3 | 17377.6029 | 0.0024  |
| 3 | 2 | 1 | 2 | 2 | 1 | 2 | 1 | 17666.4535 | -0.0034 |
| 3 | 2 | 1 | 3 | 2 | 1 | 2 | 2 | 17667.4035 | -0.0013 |
| 3 | 2 | 1 | 4 | 2 | 1 | 2 | 3 | 17666.7981 | 0.0033  |
| 4 | 1 | 4 | 3 | 3 | 0 | 3 | 2 | 11741.6306 | 0.0003  |
| 4 | 1 | 4 | 4 | 3 | 0 | 3 | 3 | 11741.7834 | -0.0030 |
| 4 | 1 | 4 | 5 | 3 | 0 | 3 | 4 | 11741.7433 | 0.0021  |
| 4 | 2 | 3 | 3 | 3 | 1 | 2 | 2 | 19358.6495 | -0.0005 |
| 4 | 2 | 3 | 4 | 3 | 1 | 2 | 3 | 19359.0551 | 0.0037  |
| 4 | 2 | 3 | 5 | 3 | 1 | 2 | 4 | 19358.7888 | 0.0047  |
| 4 | 2 | 2 | 3 | 3 | 1 | 3 | 2 | 19945.7985 | -0.0099 |

|   |   |   |   |   |   |   |   |            |         |
|---|---|---|---|---|---|---|---|------------|---------|
| 4 | 2 | 2 | 4 | 3 | 1 | 3 | 3 | 19946.4778 | -0.0017 |
| 4 | 3 | 1 | 3 | 4 | 2 | 2 | 3 | 18565.6218 | -0.0018 |
| 4 | 3 | 1 | 5 | 4 | 2 | 2 | 5 | 18565.8325 | 0.0011  |
| 4 | 3 | 1 | 4 | 4 | 2 | 2 | 4 | 18566.6377 | -0.0018 |
| 5 | 0 | 5 | 4 | 4 | 1 | 4 | 3 | 7302.8522  | 0.0058  |
| 5 | 0 | 5 | 6 | 4 | 1 | 4 | 5 | 7302.8886  | 0.0071  |
| 5 | 1 | 5 | 4 | 4 | 0 | 4 | 3 | 13639.3977 | 0.0001  |
| 5 | 1 | 5 | 5 | 4 | 0 | 4 | 4 | 13639.4571 | -0.0010 |
| 5 | 1 | 5 | 6 | 4 | 0 | 4 | 5 | 13639.4571 | 0.0005  |
| 6 | 1 | 6 | 6 | 5 | 0 | 5 | 5 | 15501.4495 | 0.0020  |
| 6 | 1 | 6 | 7 | 5 | 0 | 5 | 6 | 15501.4659 | -0.0033 |
| 7 | 0 | 7 | 7 | 6 | 1 | 6 | 6 | 11923.3298 | 0.0065  |
| 7 | 0 | 7 | 8 | 6 | 1 | 6 | 7 | 11923.3348 | -0.0029 |
| 7 | 1 | 7 | 6 | 6 | 0 | 6 | 5 | 17333.8470 | 0.0052  |
| 7 | 1 | 7 | 7 | 6 | 0 | 6 | 6 | 17333.8262 | -0.0045 |
| 7 | 1 | 7 | 8 | 6 | 0 | 6 | 7 | 17333.8640 | -0.0009 |
| 8 | 0 | 8 | 8 | 7 | 1 | 7 | 7 | 14250.4408 | -0.0021 |
| 8 | 0 | 8 | 9 | 7 | 1 | 7 | 8 | 14250.4408 | -0.0009 |

---



**Table S7.** Experimental transition frequencies of the observed  $^{14}\text{N1}$  isotopic species of isomer **I** of  $\text{CO}_2\cdots\text{IPA}$ .

| $J'$ | $K_a'$ | $K_c'$ | $J''$ | $K_a''$ | $K_c''$ | $\nu_{\text{obs}}$ (MHz) | $\Delta\nu_{\text{obs-calc}}$ (MHz) |
|------|--------|--------|-------|---------|---------|--------------------------|-------------------------------------|
| 4    | 0      | 4      | 3     | 0       | 3       | 9632.8299                | -0.0043                             |
| 4    | 1      | 4      | 3     | 1       | 3       | 9526.7292                | -0.0027                             |
| 4    | 1      | 3      | 3     | 1       | 2       | 9753.3548                | -0.0016                             |
| 5    | 0      | 5      | 4     | 0       | 4       | 12033.8352               | 0.0014                              |
| 5    | 1      | 5      | 4     | 1       | 4       | 11906.4172               | 0.0032                              |
| 5    | 1      | 4      | 4     | 1       | 3       | 12189.5504               | 0.0023                              |

**Table S8.** Experimental transition frequencies of the observed  $^{13}\text{C}_2$  isotopic species of isomer **I** of  $\text{CO}_2\cdots\text{IPA}$ .

| $J'$ | $K_a'$ | $K_c'$ | $F'$ | $J''$ | $K_a''$ | $K_c''$ | $F''$ | $\nu_{\text{obs}}$ (MHz) | $\Delta\nu_{\text{obs-calc}}$ (MHz) |
|------|--------|--------|------|-------|---------|---------|-------|--------------------------|-------------------------------------|
| 4    | 1      | 4      | 4    | 3     | 1       | 3       | 3     | 9478.3893                | 0.0027                              |
| 4    | 1      | 4      | 5    | 3     | 1       | 3       | 4     | 9478.4491                | -0.0033                             |
| 5    | 0      | 5      | 4    | 4     | 0       | 4       | 3     | 11966.0464               | -0.0012                             |
| 5    | 0      | 5      | 5    | 4     | 0       | 4       | 4     | 11966.0464               | 0.0041                              |
| 5    | 0      | 5      | 6    | 4     | 0       | 4       | 5     | 11966.0671               | -0.0015                             |
| 5    | 1      | 5      | 4    | 4     | 1       | 4       | 3     | 11846.2447               | -0.0086                             |
| 5    | 1      | 5      | 5    | 4     | 1       | 4       | 4     | 11846.2447               | -0.0022                             |
| 5    | 1      | 5      | 6    | 4     | 1       | 4       | 5     | 11846.2926               | 0.0059                              |
| 4    | 1      | 3      | 4    | 3     | 1       | 2       | 3     | 9689.4442                | 0.0037                              |
| 4    | 1      | 3      | 5    | 3     | 1       | 2       | 4     | 9689.4860                | -0.0036                             |

**Table S9.** Experimental transition frequencies of the observed  $^{13}\text{C}_4(^{13}\text{C}_5)$  isotopic species of isomer **I** of  $\text{CO}_2\cdots\text{IPA}$ .

| $J'$ | $K_a'$ | $K_c'$ | $F'$ | $J''$ | $K_a''$ | $K_c''$ | $F''$ | $\nu_{\text{obs}}$ (MHz) | $\Delta\nu_{\text{obs-calc}}$ (MHz) |
|------|--------|--------|------|-------|---------|---------|-------|--------------------------|-------------------------------------|
| 3    | 0      | 3      | 2    | 2     | 0       | 2       | 1     | 7169.5697                | 0.0079                              |
| 3    | 0      | 3      | 3    | 2     | 0       | 2       | 2     | 7169.6122                | -0.0046                             |
| 3    | 0      | 3      | 4    | 2     | 0       | 2       | 3     | 7169.6372                | -0.0061                             |
| 4    | 0      | 4      | 3    | 3     | 0       | 3       | 2     | 9556.1484                | 0.0101                              |
| 4    | 0      | 4      | 4    | 3     | 0       | 3       | 3     | 9556.1484                | -0.0027                             |
| 4    | 0      | 4      | 5    | 3     | 0       | 3       | 4     | 9556.1705                | -0.0051                             |
| 4    | 1      | 4      | 4    | 3     | 1       | 3       | 3     | 9464.7273                | -0.0015                             |
| 4    | 1      | 4      | 5    | 3     | 1       | 3       | 4     | 9464.7918                | -0.0025                             |
| 5    | 0      | 5      | 4    | 4     | 0       | 4       | 3     | 11939.8438               | -0.0031                             |
| 5    | 0      | 5      | 5    | 4     | 0       | 4       | 4     | 11939.8438               | 0.0008                              |
| 5    | 0      | 5      | 6    | 4     | 0       | 4       | 5     | 11939.8641               | -0.0039                             |
| 5    | 1      | 5      | 4    | 4     | 1       | 4       | 3     | 11829.3839               | -0.0057                             |
| 5    | 1      | 5      | 5    | 4     | 1       | 4       | 4     | 11829.3839               | 0.0004                              |
| 5    | 1      | 5      | 6    | 4     | 1       | 4       | 5     | 11829.4210               | -0.0021                             |
| 6    | 0      | 6      | 5    | 5     | 0       | 5       | 4     | 14320.0324               | -0.0044                             |
| 6    | 0      | 6      | 7    | 5     | 0       | 5       | 6     | 14320.0564               | 0.0061                              |
| 6    | 1      | 6      | 5    | 5     | 1       | 5       | 4     | 14193.0358               | 0.0049                              |
| 6    | 1      | 6      | 6    | 5     | 1       | 5       | 5     | 14193.0358               | 0.0087                              |
| 6    | 1      | 6      | 7    | 5     | 1       | 5       | 6     | 14193.0572               | 0.0025                              |
| 4    | 1      | 3      | 4    | 3     | 1       | 2       | 3     | 9657.9217                | -0.0040                             |
| 4    | 1      | 3      | 5    | 3     | 1       | 2       | 4     | 9657.9707                | -0.0038                             |
| 5    | 1      | 4      | 4    | 4     | 1       | 3       | 3     | 12070.8167               | 0.0017                              |
| 5    | 1      | 4      | 5    | 4     | 1       | 3       | 4     | 12070.7837               | 0.0016                              |
| 5    | 1      | 4      | 6    | 4     | 1       | 3       | 5     | 12070.8167               | 0.0064                              |
| 5    | 2      | 4      | 5    | 4     | 2       | 3       | 4     | 11950.7697               | 0.0033                              |
| 5    | 2      | 4      | 6    | 4     | 2       | 3       | 5     | 11950.8666               | 0.0011                              |
| 5    | 2      | 4      | 4    | 4     | 2       | 3       | 3     | 11950.8666               | -0.0092                             |

**Table S10.** Experimental transition frequencies of the observed  $^{13}\text{C}14$  isotopic species of isomer **I** of  $\text{CO}_2\cdots\text{IPA}$ .

| $J'$ | $K_a'$ | $K_c'$ | $F'$ | $J''$ | $K_a''$ | $K_c''$ | $F''$ | $\nu_{\text{obs}}$ (MHz) | $\Delta\nu_{\text{obs-calc}}$ (MHz) |
|------|--------|--------|------|-------|---------|---------|-------|--------------------------|-------------------------------------|
| 4    | 0      | 4      | 3    | 3     | 0       | 3       | 2     | 9560.9942                | 0.0062                              |
| 4    | 0      | 4      | 4    | 3     | 0       | 3       | 3     | 9560.9942                | -0.0055                             |
| 4    | 0      | 4      | 5    | 3     | 0       | 3       | 4     | 9561.0210                | -0.0041                             |
| 4    | 1      | 4      | 4    | 3     | 1       | 3       | 3     | 9462.4334                | 0.0000                              |
| 4    | 1      | 4      | 5    | 3     | 1       | 3       | 4     | 9462.4967                | -0.0024                             |
| 5    | 0      | 5      | 4    | 4     | 0       | 4       | 3     | 11945.1605               | 0.0006                              |
| 5    | 0      | 5      | 5    | 4     | 0       | 4       | 4     | 11945.1605               | 0.0058                              |
| 5    | 0      | 5      | 6    | 4     | 0       | 4       | 5     | 11945.1790               | -0.0019                             |
| 5    | 1      | 5      | 4    | 4     | 1       | 4       | 3     | 11826.3354               | -0.0047                             |
| 5    | 1      | 5      | 5    | 4     | 1       | 4       | 4     | 11826.3354               | 0.0017                              |
| 5    | 1      | 5      | 6    | 4     | 1       | 4       | 5     | 11826.3777               | 0.0042                              |
| 5    | 1      | 4      | 4    | 4     | 1       | 3       | 3     | 12087.6199               | -0.0036                             |
| 5    | 1      | 4      | 5    | 4     | 1       | 3       | 4     | 12087.5934               | 0.0032                              |
| 5    | 1      | 4      | 6    | 4     | 1       | 3       | 5     | 12087.6199               | 0.0012                              |

**Table S11.** Intensities (in arbitrary units) of the two isomers for several  $\mu_a$ -type selected transitions.

| Transitions                | F' $\leftarrow$ F'' | Conformer | Frequencies | Intensities |
|----------------------------|---------------------|-----------|-------------|-------------|
| $3_{03} \leftarrow 2_{02}$ | $4 \leftarrow 3$    | I         | 7244.1548   | 0.057       |
|                            |                     | II        | 6359.0155   | 0.023       |
| $4_{04} \leftarrow 3_{03}$ | $5 \leftarrow 4$    | I         | 9654.9196   | 0.157       |
|                            |                     | II        | 8470.2508   | 0.052       |
| $4_{14} \leftarrow 3_{13}$ | $5 \leftarrow 4$    | I         | 9554.8774   | 0.040       |
|                            |                     | II        | 8297.2692   | 0.025       |
| $5_{05} \leftarrow 4_{04}$ | $6 \leftarrow 5$    | I         | 12062.3343  | 0.105       |
|                            |                     | II        | 10574.3360  | 0.058       |
| $7_{17} \leftarrow 6_{16}$ | $8 \leftarrow 7$    | I         | 16712.0049  | 0.008       |
|                            |                     | II        | 14502.1502  | 0.002       |
| $8_{08} \leftarrow 7_{07}$ | $9 \leftarrow 8$    | I         | 19257.1024  | 0.016       |
|                            |                     | II        | 16829.2515  | 0.004       |

**Table S12.** The percentage differences between the experimental and theoretical rotational constants of the isomers **I** and **II** of CO<sub>2</sub>···IPA adduct at the different levels of theory. <sup>a)</sup>

| Methods       | Basis sets        | Isomer I    |             |             |                      | Isomer II   |             |             |                      |
|---------------|-------------------|-------------|-------------|-------------|----------------------|-------------|-------------|-------------|----------------------|
|               |                   | A (MHz)     | B (MHz)     | C (MHz)     | Ave <sup>b</sup> (%) | A (MHz)     | B (MHz)     | C (MHz)     | Ave <sup>b</sup> (%) |
| Exp.          |                   | 3854.6000   | 1234.5063   | 1181.3414   | -                    | 4778.4169   | 1107.7740   | 1014.2971   | -                    |
| MP2           | 6-311++G(d,p)     | 3831(0.6%)  | 1260(-2.0%) | 1197(-1.3%) | 1.3                  | 4724(1.1%)  | 1125(-1.5%) | 1083(-6.8%) | 3.2                  |
|               | 6-311++G(2d,p)    | 3850(0.1%)  | 1262(-2.2%) | 1200(-1.6%) | 1.3                  | 4777(0.0%)  | 1133(-2.3%) | 1061(-4.6%) | 2.3                  |
|               | 6-311++G(2df,2pd) | 3872(-0.4%) | 1275(-3.3%) | 1212(-2.6%) | 2.1                  | 4802(-0.5%) | 1144(-3.3%) | 1074(-5.9%) | 3.2                  |
|               | 6-311++G(3df,3pd) | 3860(-0.1%) | 1285(-4.1%) | 1220(-3.3%) | 2.5                  | 4786(-0.2%) | 1148(-3.6%) | 1091(-7.6%) | 3.8                  |
|               | def2-TZVP         | 3882(-0.7)  | 1268(-2.7%) | 1207(-2.2%) | 1.9                  | 4788(-0.2%) | 1132(-2.2%) | 1054(-3.9%) | 2.1                  |
|               | jun-cc-PVTZ       | 3862(-0.2%) | 1266(-2.6%) | 1203(-1.9%) | 1.5                  | 4789(-0.2%) | 1134(-2.4%) | 1058(-4.3%) | 2.3                  |
|               | aug-cc-PVTZ       | 3865(-0.3%) | 1292(-4.7%) | 1227(-3.8%) | 2.9                  | 4800(-0.4%) | 1152(-4.0%) | 1070(-5.5%) | 3.3                  |
| B3LYP-D3(BJ)  | 6-311++G(d,p)     | 3873(-0.5%) | 1291(-4.6%) | 1232(-4.3%) | 3.1                  | 4780(0.0%)  | 1142(-3.1%) | 1067(-5.2%) | 2.8                  |
|               | 6-311++G(2d,p)    | 3872(-0.5%) | 1277(-3.5%) | 1219(-3.2%) | 2.4                  | 4789(-0.2%) | 1134(-2.4%) | 1057(-4.2%) | 2.3                  |
|               | 6-311++G(2df,2pd) | 3878(-0.6%) | 1271(-3.0%) | 1213(-2.7%) | 2.1                  | 4793(-0.3%) | 1133(-2.3%) | 1057(-4.2%) | 2.3                  |
|               | 6-311++G(3df,3pd) | 3870(-0.4%) | 1274(-3.2%) | 1215(-2.9%) | 2.2                  | 4793(-0.3%) | 1131(-2.1%) | 1055(-4.0%) | 2.1                  |
|               | def2-TZVP         | 3879(-0.6%) | 1275(-3.3%) | 1217(-3.0%) | 2.3                  | 4806(-0.6%) | 1132(-2.2%) | 1035(-2.1%) | 1.6                  |
|               | jun-cc-PVTZ       | 3873(-0.5%) | 1267(-2.7%) | 1209(-2.3%) | 1.8                  | 4788(-0.2%) | 1127(-1.7%) | 1050(-3.6%) | 1.8                  |
|               | aug-cc-PVTZ       | 3875(-0.5%) | 1270(-2.9%) | 1212(-2.6%) | 2.0                  | 4792(-0.3%) | 1130(-2.0%) | 1047(-3.2%) | 1.8                  |
| B2PLYP-D3(BJ) | 6-311++G(d,p)     | 3856(0.0%)  | 1275(-3.3%) | 1214(-2.8%) | 2.0                  | 4772(0.1%)  | 1129(-1.9%) | 1056(-4.1%) | 2.0                  |
|               | 6-311++G(2d,p)    | 3862(-0.2%) | 1267(-2.7%) | 1207(-2.2%) | 1.7                  | 4784(-0.1%) | 1128(-1.8%) | 1049(-3.4%) | 1.8                  |
|               | 6-311++G(2df,2pd) | 3872(-0.5%) | 1265(-2.5%) | 1205(-2.0%) | 1.7                  | 4795(-0.3%) | 1130(-2.0%) | 1051(-3.6%) | 2.0                  |
|               | 6-311++G(3df,3pd) | 3862(-0.2%) | 1272(-3.1%) | 1211(-2.5%) | 1.9                  | 4793(-0.3%) | 1130(-2.0%) | 1052(-3.7%) | 2.0                  |

|        |                   |             |             |             |     |             |             |             |     |
|--------|-------------------|-------------|-------------|-------------|-----|-------------|-------------|-------------|-----|
|        | def2-TZVP         | 3873(-0.5%) | 1266(-2.6%) | 1206(-2.1%) | 1.7 | 4803(-0.5%) | 1126(-1.6%) | 1024(-1.0%) | 1.0 |
|        | jun-cc-PVTZ       | 3865(-0.3%) | 1259(-2.0%) | 1199(-1.5%) | 1.2 | 4788(-0.2%) | 1123(-1.3%) | 1041(-2.6%) | 1.4 |
|        | aug-cc-PVTZ       | 3866(-0.3%) | 1269(-2.8%) | 1208(-2.3%) | 1.8 | 4798(-0.4%) | 1130(-2.0%) | 1036(-2.1%) | 1.5 |
| ωB97XD | 6-311++G(d,p)     | 3880(-0.7%) | 1289(-4.4%) | 1229(-4.0%) | 3.0 | 4809(-0.6%) | 1138(-2.8%) | 1060(-4.5%) | 2.6 |
|        | 6-311++G(2d,p)    | 3879(-0.6%) | 1275(-3.3%) | 1215(-2.8%) | 2.2 | 4813(-0.7%) | 1129(-1.9%) | 1052(-3.7%) | 2.1 |
|        | 6-311++G(2df,2pd) | 3890(-0.9%) | 1265(-2.5%) | 1207(-2.2%) | 1.9 | 4815(-0.8%) | 1128(-1.9%) | 1052(-3.8%) | 2.1 |
|        | 6-311++G(3df,3pd) | 3878(-0.6%) | 1270(-2.9%) | 1210(-2.5%) | 2.0 | 4810(-0.7%) | 1118(-0.9%) | 1044(-2.9%) | 1.5 |
|        | def2-TZVP         | 3888(-0.9%) | 1256(-1.8%) | 1199(-1.5%) | 1.4 | 4813(-0.7%) | 1114(-0.6%) | 1038(-2.3%) | 1.2 |
|        | jun-cc-PVTZ       | 3881(-0.7%) | 1249(-1.2%) | 1191(-0.8%) | 0.9 | 4804(-0.5%) | 1113(-0.5%) | 1040(-2.5%) | 1.2 |
|        | aug-cc-PVTZ       | 3885(-0.8%) | 1252(-1.4%) | 1194(-1.1%) | 1.1 | 4806(-0.6%) | 1115(-0.6%) | 1041(-2.6%) | 1.3 |
| CCSD   | 6-311++G(d,p)     | 3836(0.5%)  | 1236(-0.1%) | 1178(0.3%)  | 0.3 | 4750(0.6%)  | 1102(0.5%)  | 1043(-2.9%) | 1.3 |
|        | 6-311++G(2d,p)    | 3853(0.1%)  | 1231(0.3%)  | 1173(0.7%)  | 0.3 | 4781(-0.1%) | 1104(0.3%)  | 1028(-1.4%) | 0.6 |

a) The values in parentheses are percentage differences defined as:  $100\% \times (\text{experimental-theoretical})/\text{experimental}$ .

b) Average absolute percentage error for each level.

**Table S13.** Experimental ( $r_s$  and  $r_0$ ) and theoretical ( $r_e$ ) coordinates of the four C and one N atoms for the isomer **I** of CO<sub>2</sub>⋯IPA adduct.

| Atom |       | $a$ (Å)          | $b$ (Å)         | $c$ (Å)        |
|------|-------|------------------|-----------------|----------------|
| N1   | $r_s$ | $\pm 0.534(3)^a$ | $\pm 1.164(11)$ | $0.000^b$      |
|      | $r_0$ | $-0.558(7)$      | $1.166(8)$      | $0.000$        |
|      | $r_e$ | $-0.546$         | $1.158$         | $0.000$        |
| C2   | $r_s$ | $\pm 1.819(1)$   | $\pm 0.412(34)$ | $0.000^b$      |
|      | $r_0$ | $-1.822(6)$      | $0.424(10)$     | $0.000$        |
|      | $r_e$ | $-1.804$         | $0.407$         | $0.000$        |
| C4   | $r_s$ | $\pm 1.866(2)$   | $\pm 0.434(8)$  | $\pm 1.256(3)$ |
|      | $r_0$ | $-1.872(5)$      | $-0.455(3)$     | $-1.271(1)$    |
|      | $r_e$ | $-1.871$         | $-0.446$        | $-1.257$       |
| C5   | $r_s$ | $\pm 1.866(2)$   | $\pm 0.434(8)$  | $\pm 1.256(3)$ |
|      | $r_0$ | $-1.872(5)$      | $-0.455(3)$     | $1.271(1)$     |
|      | $r_e$ | $-1.871$         | $-0.446$        | $1.257$        |
| C14  | $r_s$ | $\pm 2.028(1)$   | $\pm 0.283(31)$ | $0.000^b$      |
|      | $r_0$ | $2.013(1)$       | $-0.238(1)$     | $0.000$        |
|      | $r_e$ | $2.002$          | $-0.237$        | $0.000$        |

a) Constrain's errors expressed in parentheses in units of the last digit.

b)  $c$ -coordinates are fixed at zero by symmetry.



**Table S14.** Partial  $r_0$  and calculated geometry at  $\omega$ B97XD/jun-cc-pVTZ level of isomer I.

| Bond lengths (Å) |                               | Valence angles (°) |                 | Dihedral angles (°) |        |
|------------------|-------------------------------|--------------------|-----------------|---------------------|--------|
| C2N1             | 1.465                         |                    |                 |                     |        |
| H3C2             | 1.099                         | H3C2N1             | 111.4           |                     |        |
| C4C2             | <b>1.546(8)</b> <sup>a)</sup> | C4C2H3             | <b>109.1(9)</b> | C4C2H3N1            | -119.6 |
| C5C2             | <b>1.546(8)</b>               | C5C2H3             | <b>109.1(9)</b> | C5C2H3N1            | 119.6  |
| H6C4             | 1.090                         | H6C4C2             | 110.7           | H6C4C2H3            | -58.1  |
| H7C4             | 1.092                         | H7C4C2             | 111.1           | H7C4C2H3            | 61.6   |
| H8C4             | 1.090                         | H8C4C2             | 110.2           | H8C4C2H3            | -178.4 |
| H9C5             | 1.090                         | H9C5C2             | 110.7           | H9C5C2H3            | -58.1  |
| H10C5            | 1.092                         | H10C5C2            | 111.1           | H10C5C2H3           | -61.6  |
| H11C5            | 1.090                         | H11C5C2            | 110.2           | H11C5C2H3           | 178.4  |
| H12N1            | 1.012                         | H12N1C2            | 110.8           | H12N1C2H3           | 59.1   |
| H13N1            | 1.012                         | H13N1C2            | 110.8           | H13N1C2H3           | -59.1  |
| C14N1            | <b>2.929(13)</b>              | C14N1C2            | <b>121.0(9)</b> | C14N1C2H3           | 180.0  |
| O15C14           | 1.157                         | O15C14N1           | <b>92.8(6)</b>  | O15C14N1C2          | 0.0    |
| O16C14           | 1.157                         | O16C14O15          | 175.9           | O16C14O15C2         | 180.0  |

a) Error in parentheses in units of the last digit. The parameters in bold have been adjusted to reproduce the experimental values of rotational constants. Their theoretical values are 1.521 Å, 108.0°, 1.521 Å, 108.0°, 2.905 Å, 120.5° and 94.1°, respectively.

**Table S15.** Partial  $r_0$  and calculated geometry at  $\omega$ B97XD/jun-cc-pVTZ level of isomer **II**.

| Bond lengths (Å) |                               | Valence angles (°) |       | Dihedral angles (°) |                                |
|------------------|-------------------------------|--------------------|-------|---------------------|--------------------------------|
| C2N1             | 1.464                         |                    |       |                     |                                |
| H3C2             | 1.093                         | H3C2N1             | 106.3 |                     |                                |
| C4C2             | 1.528                         | C4C2H3             | 108.5 | C4C2H3N1            | -122.5                         |
| C5C2             | 1.521                         | C5C2H3             | 108.1 | C5C2H3N1            | 116.7                          |
| H6C4             | 1.091                         | H6C4C2             | 111.3 | H6C4C2N1            | -177.1                         |
| H7C4             | 1.091                         | H7C4C2             | 111.0 | H7C4C2N1            | -56.8                          |
| H8C4             | 1.093                         | H8C4C2             | 110.4 | H8C4C2N1            | 63.0                           |
| H9C5             | 1.090                         | H9C5C2             | 110.9 | H9C5C2C4            | -56.7                          |
| H10C5            | 1.089                         | H10C5C2            | 110.8 | H10C5C2C4           | -177.3                         |
| H11C5            | 1.093                         | H11C5C2            | 110.5 | H11C5C2C4           | 62.7                           |
| H12N1            | 1.013                         | H12N1C2            | 110.3 | H12N1C2C4           | -65.5                          |
| H13N1            | 1.012                         | H13N1C2            | 110.6 | H13N1C2C4           | 52.2                           |
| C14N1            | <b>2.916(4)</b> <sup>a)</sup> | C14N1C2            | 111.3 | C14N1C2C4           | 169.1                          |
| O15C14           | 1.158                         | O15C14N1           | 90.6  | O15C14N1C2          | <b>-14.5(12)</b> <sup>a)</sup> |
| O16C14           | 1.157                         | O16C14O15          | 176.5 | O16C14O15N1         | 178.5                          |

a) Error in parentheses in units of the last digit. The parameters in bold have been adjusted to reproduce the experimental values of rotational constants. Their theoretical values are 2.877 Å and -22.3 °, respectively.

**Table S16.** Stabilization energy contributions ( $\geq 0.21$  kJ/mol) for the isomer **I** of the CO<sub>2</sub>⋯IPA adduct.

| Donor NBO                   | Acceptor NBO           | E(2) [kJ/mol] |
|-----------------------------|------------------------|---------------|
| From IPA to CO <sub>2</sub> |                        |               |
| BD (1) C2 – N4              | RY*(1) C5              | 0.21          |
| LP (1) N4                   | RY* (4) C5             | 0.29          |
| LP (1) N4                   | RY* (3) O7             | 0.25          |
| LP (1) N4                   | BD*(1) C5 – O6         | 0.33          |
| <b>LP (1) N4</b>            | <b>BD*(3) C5 – O6</b>  | <b>6.99</b>   |
| From CO <sub>2</sub> to IPA |                        |               |
| BD (1) C5 – O6              | RY*(3) N4              | 0.33          |
| BD (3) C5 – O6              | BD*(1) C2 – N4         | 0.59          |
| LP (1) O7                   | RY*(3) H10             | 0.25          |
| LP (1) O7                   | RY*(3) H13             | 0.25          |
| <b>LP (2) O7</b>            | <b>BD*(1) C1 – H10</b> | <b>0.46</b>   |
| <b>LP (2) O7</b>            | <b>BD*(1) C3 – H13</b> | <b>0.46</b>   |

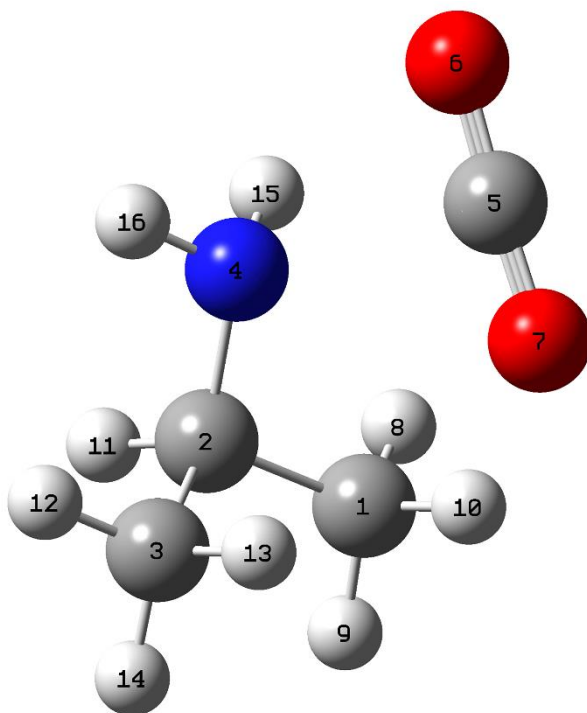

**Table S17.** Stabilization energy contributions ( $\geq 0.21$  kJ/mol) for the isomer **II** of the CO<sub>2</sub>⋯IPA adduct.

| Donor NBO                   | Acceptor NBO           | E(2) [kJ/mol] |
|-----------------------------|------------------------|---------------|
| From IPA to CO <sub>2</sub> |                        |               |
| BD (1) C2 – N4              | RY*(1) C5              | 0.25          |
| LP (1) N4                   | RY* (4) C5             | 0.29          |
| LP (1) N4                   | RY* (5) C5             | 0.29          |
| LP (1) N4                   | RY* (3) O6             | 0.25          |
| LP (1) N4                   | RY* (3) O7             | 0.21          |
| LP (1) N4                   | BD*(1) C5 – O7         | 0.38          |
| <b>LP (1) N4</b>            | <b>BD*(3) C5 – O7</b>  | <b>8.28</b>   |
| From CO <sub>2</sub> to IPA |                        |               |
| BD (3) C5 – O7              | RY*(1) N4              | 0.25          |
| BD (3) C5 – O7              | BD*(1) C2 – N4         | 0.29          |
| LP (2) O6                   | BD*(1) C1 – C2         | 0.38          |
| <b>LP (3) O6</b>            | <b>BD*(1) C3 – H12</b> | <b>0.21</b>   |

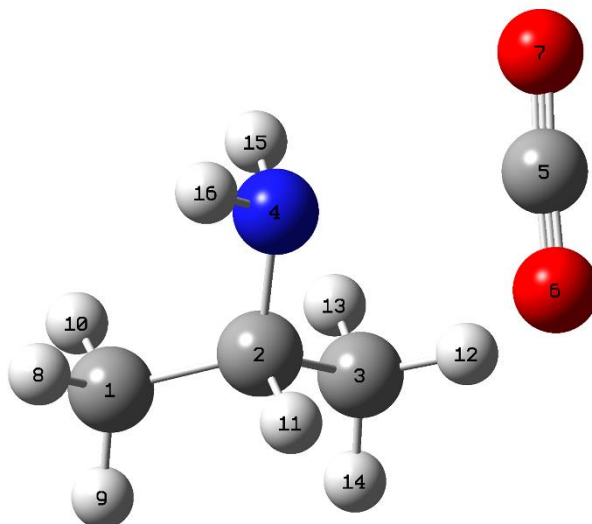

**Table S18.** NPA charges for the isomers **I** and **II** of CO<sub>2</sub>⋯IPA adduct and CO<sub>2</sub> and IPA isolated molecules. Bold values highlight the values of the sulfur and fluorine atoms involved in the charge transfer.

|   | Isomer <b>I</b> | Isomer <b>II</b> | <i>Trans</i>  | <i>Gauche</i> | CO <sub>2</sub> |
|---|-----------------|------------------|---------------|---------------|-----------------|
| C | -0.585          | -0.591           | -0.581        | -0.592        |                 |
| C | -0.031          | -0.038           | -0.032        | -0.034        |                 |
| C | -0.585          | -0.582           | -0.581        | -0.581        |                 |
| N | <b>-0.851</b>   | <b>-0.842</b>    | <b>-0.840</b> | <b>-0.831</b> |                 |
| H | 0.194           | 0.196            | 0.195         | 0.196         |                 |
| H | 0.202           | 0.201            | 0.200         | 0.199         |                 |
| H | 0.208           | 0.192            | 0.203         | 0.191         |                 |
| H | 0.147           | 0.176            | 0.144         | 0.169         |                 |
| H | 0.194           | 0.209            | 0.195         | 0.210         |                 |
| H | 0.208           | 0.189            | 0.203         | 0.189         |                 |
| H | 0.202           | 0.203            | 0.200         | 0.199         |                 |
| H | 0.352           | 0.345            | 0.348         | 0.339         |                 |
| H | 0.353           | 0.350            | 0.348         | 0.346         |                 |
| C | <b>1.009</b>    | <b>1.008</b>     |               |               | <b>0.987</b>    |
| O | -0.507          | -0.512           |               |               | -0.493          |
| O | -0.509          | -0.505           |               |               | -0.493          |

**Table S19.** Results of the SAPT analysis for the isomers **I** and **II** of CO<sub>2</sub>⋯IPA, and compared with the complexes of CO<sub>2</sub> with eight nitrogen-containing compounds <sup>a)</sup>.

| Complexes                          | NCIs <sup>b)</sup> | Distances            | $E_{\text{elec}}$        | $E_{\text{ind}}$ | $E_{\text{disp}}$ | $E_{\text{ex}}$ | $E_{\text{t}}$ |
|------------------------------------|--------------------|----------------------|--------------------------|------------------|-------------------|-----------------|----------------|
| CO <sub>2</sub> ⋯IPA- <b>I</b>     | C⋯N                | 2.929 <sup>c)</sup>  | -30.6(61%) <sup>d)</sup> | -4.4(9%)         | -15.0(30%)        | 29.1            | -20.9          |
| CO <sub>2</sub> ⋯IPA- <b>II</b>    | C⋯N                | 2.916 <sup>c)</sup>  | -30.5(61%)               | -4.7(9%)         | -14.5(29%)        | 28.9            | -20.8          |
| CO <sub>2</sub> ⋯HCN               | C⋯N                | 2.998 <sup>c)</sup>  | -10.7(58%)               | -1.6(9%)         | -6.3(34%)         | 7.9             | -10.7          |
| CO <sub>2</sub> ⋯NH <sub>3</sub>   | C⋯N                | 2.9875 <sup>c)</sup> | -24.4(67%)               | -3.5(10%)        | -8.5(23%)         | 20.4            | -16.0          |
| CO <sub>2</sub> ⋯MA <sup>e)</sup>  | C⋯N                | 2.881 <sup>f)</sup>  | -29.2(64%)               | -4.4(10%)        | -11.8(26%)        | 26.3            | -19.1          |
| CO <sub>2</sub> ⋯EA <sup>e)</sup>  | C⋯N                | 2.881 <sup>f)</sup>  | -29.9(62%)               | -4.6(9%)         | -14.1(29%)        | 28.3            | -20.3          |
| CO <sub>2</sub> ⋯NPA <sup>e)</sup> | C⋯N                | 2.878 <sup>f)</sup>  | -30.0(61%)               | -4.7(9%)         | -14.8(30%)        | 28.8            | -20.7          |
| CO <sub>2</sub> ⋯Py                | C⋯N                | 2.7977 <sup>c)</sup> | -31.3(62%)               | -5.0(10%)        | -14.5(29%)        | 26.5            | -24.3          |
| CO <sub>2</sub> ⋯FM- <b>I</b>      | C⋯O                | 2.836 <sup>c)</sup>  | -32.7(61%)               | -7.1(13%)        | -13.8(26%)        | 27.4            | -26.2          |
| CO <sub>2</sub> ⋯FM- <b>II</b>     | C⋯O                | 2.789 <sup>c)</sup>  | -26.6(62%)               | -4.9(11%)        | -11.6(27%)        | 21.0            | -22.1          |

a) All the values are given in kJ mol<sup>-1</sup>. b) NCIs represent the type of non-covalent interactions occurring in the complex. c) the values (in unit of Å) derive from the corresponding  $r_0$  structures. d) The values in parenthesis are the contribution of each component with respect to the total attractive interaction ( $E_{\text{elec}} + E_{\text{ind}} + E_{\text{disp}}$ ). e) only the most stable conformer is considered for these two conformers. f) Calculated at the  $\omega$ B97XD/aug-cc-pVTZ level.
